# Supplementary material
Source: PubMed Central journal article supplement (PMC5301153)
Supplement: cmi201566x1.pdf [file cmi201566x1.pdf]

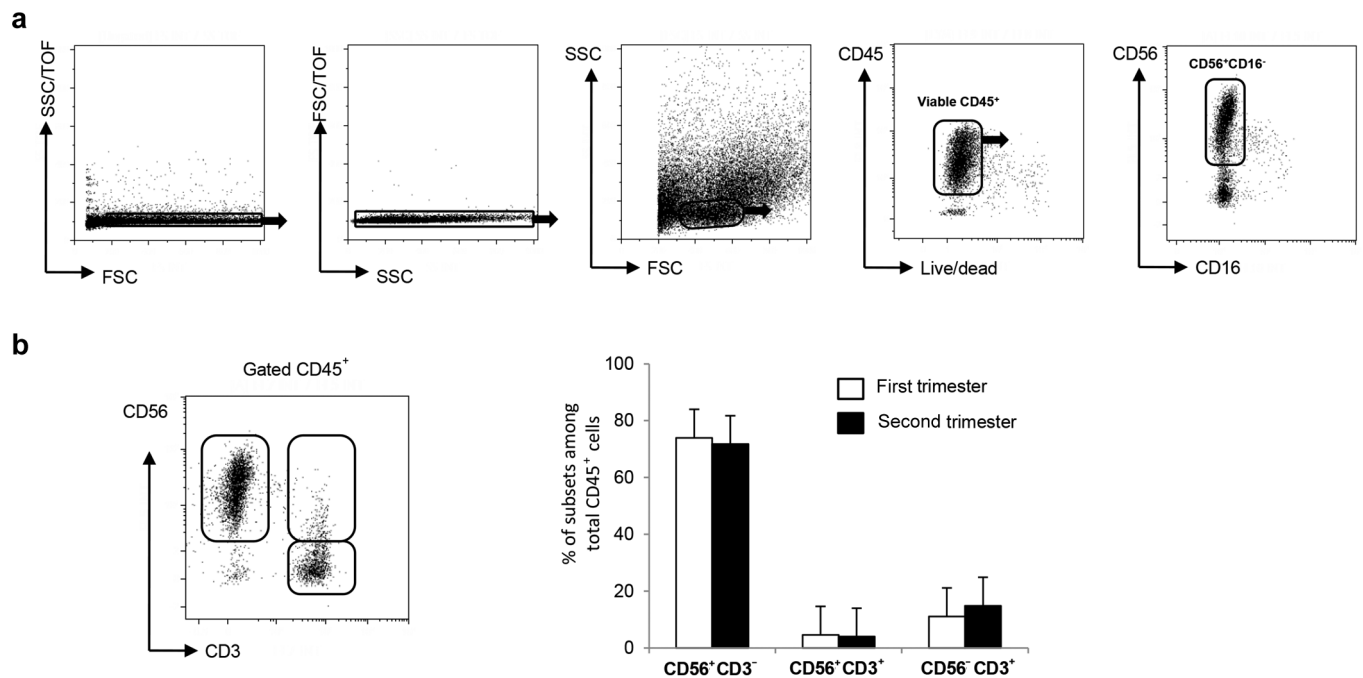

**Figure S1** Representative plots showing the gating strategy of flow cytometry analysis for dNK cells from a 10.5wk decidua. **(a)** Sample was processed and stained as described in Materials and Methods. To assess the dNK subsets and their population, singlets are gated by the combination plots of FSC vs SSC/TOF and SSC vs FSC/TOF (FSC, forward-scattered light; SSC, side-scattered light; TOF, time of flight). Then viable CD45<sup>+</sup> leukocytes population was further gated by their CD56/CD16 profile. **(b)** The percentage of CD56<sup>+</sup>CD3<sup>-</sup>, CD56<sup>+</sup>CD3<sup>+</sup>, CD56<sup>-</sup>CD3<sup>+</sup> population from 1<sup>st</sup> and 2<sup>nd</sup> trimester of pregnancy. n=34 (1<sup>st</sup> trimester) and 31 (2<sup>nd</sup> trimester). No significant difference was detected in each subset between 1<sup>st</sup> and 2<sup>nd</sup> trimester samples. Data acquisition was processed by Gallios Flow Cytometer and analysis was performed by Kaluza 1.2 software (Beckman coulter)

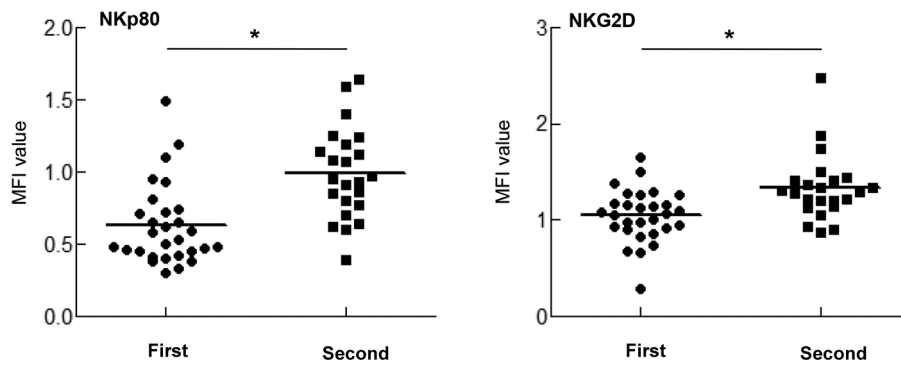

**Figure S2** Mean fluorescence intensity (MFI) of NKp80 and NKG2D expression by CD56<sup>+</sup>CD16<sup>-</sup> dNK cells from 1<sup>st</sup> and 2<sup>nd</sup> trimester pregnancy. Data analysis was conducted by Kaluza1.2 software (Beckman coulter). \*p < 0.05.

**Supplementary Table 1 Maternal characteristics of 1<sup>st</sup> and 2<sup>nd</sup> trimester pregnancy**

| lncRNA                              | 1 <sup>st</sup> trimester | 2 <sup>nd</sup> trimester | p value* |
|-------------------------------------|---------------------------|---------------------------|----------|
| Maternal age (yr; mean $\pm$ SD)    | 28.6 $\pm$ 7.2            | 27.1 $\pm$ 7.0            | p>0.05   |
| Gestational age (wk; mean $\pm$ SD) | 9 $\pm$ 1.8               | 16 $\pm$ 1.9              | p<0.01   |
| Gravidity (mean $\pm$ SD)           | 3.6 $\pm$ 4.1             | 2.6 $\pm$ 1.6             | p>0.05   |
| Parity (mean $\pm$ SD)              | 1.2 $\pm$ 1.4             | 0.8 $\pm$ 0.9             | p>0.05   |

\*p value was calculated by Mann-Whitney Test (SPSS17.0).
